# Supplementary material
Source: publisher site journal article supplement (http://static.cambridge.org/content/id/urn:cambridge.org:id:article:S104161021800145X/resource/name/S104161021800145Xsupp001.docx)
Supplement: Supplementary file 1 [file S104161021800145Xsupp001.docx]

This supplemental table details the neuropsychological and functional tests used in each study to define normal cognition and Mild Cognitive Impairment, as well as the diagnostic criteria for Alzheimer’s disease

Supplemental table 1. Tests and other information for the contributing COSMIC studies

| **Study** | **Verbal memory test(s)** | **Visual memory test** | **Non-memory neuropsychological tests** | **Functional tests** | **Memory complaint** | **Diagnosis** |
| --- | --- | --- | --- | --- | --- | --- |
| HELIAD | Greek Verbal Learning Test  Corrected for sex, age and education | Medical College of Georgia Complex Figure | Clock test; Months test; Judgment of Line Orientation; Trail Making test A and B; Verbal fluency, semantic and phonological; Boston Naming Test; Comprehension and Repetition Complex Ideational Material subtests; Vocabulary; Sentence repetition; Graphical Sequences test; Go/No-Go. | Blessed Functional Activity Scale; Lawton & Brody ADLs (4 items); subjective somatic functionality questions; | Geriatric Depression Scale item #10; subjective memory complaints questions: “Subjective symptoms of loss of memory” | Consensus. Panel of experts |
| EAS | Cued selective reminding test  Corrected for age | Complex Figure | Boston Naming Test; WAIS information (general knowledge), vocabulary, Digit span, Digit symbol (raw and at 90 s), Block design, Verbal IQ; Verbal fluency (FAS); Category fluency (fruits, animals, vegetables); Wide Range Achievement Test; Stroop; Trail Making Test A and B; Complex figure copy | Lawton & Brody ADLs and Physical Maintenance Scale | Geriatric Depression Scale item #10. Consortium to Establish a registry for Alzheimer’s disease subjective cognitive impairment self- administered questionnaire and EAS Health Self-Assessment questions | Consensus. Panel of experts |
| Sydney MAS | Rey Auditory Verbal Learning Test  Corrected for age and education | Benton Visual Retention test | Digit symbol; Trail Making Test A and B; Boston Naming; Verbal Fluency, animals and FAS; Block design; National Adult Reading Test; Pegboard. | Lawton and Brody ADLs; Bayer Activities of Daily Living Scale (IADLs) | Summary across multiple questions | Consensus. Panel of experts |
| KLOSCAD | Word list memory test (CERAD) | Constructional memory, based on Constructional Praxis test (CERAD) | Constructional Praxis test (CERAD); Trail Making Test A and B; Digit span; Frontal Assessment Battery; Executive Clock Drawing Test; Categorical Fluency (animals); Boston Naming Test | Disability Assessment for Dementia; Dependence Scale | Subjective Memory Complaints Questionnaire | Consensus. Panel of experts |
| Invece.Ab | Rey Auditory-Verbal Learning Test | Rey-Osterrieth Complex Figure | Phonemic and Semantic Verbal Fluency Tests; Raven’s Coloured Matrices; Clock Drawing Test; Attentional Matrices; Trail Making Test A and B; | Lawton and Brody ADLs | 2 items | Consensus. Panel of experts |
| Main outcome for MCI diagnosis for each verbal/visual memory tests was delayed recall. Non-memory neuropsychological tests were used to label participants as either single- or multiple-domains amnestic MCI | | | | | |  |
